# Supplementary material for: Molecular and Functional Characterization of Pyrokinin-Like Peptides in the Western Tarnished Plant Bug Lygus hesperus (Hemiptera: Miridae)
Source: Insects. 2021 Oct 6;12(10):914. doi: 10.3390/insects12100914 (PMC8541414; doi:10.3390/insects12100914)
Supplement: Supplementary file 1 [file insects-12-00914-s001.zip › [Insects] insects-1385913-Supplementary materials/Table S1 accession phylogeny.xlsx]

## Sheet: accession numbers for phylogeny
Table S1. Accession numbers of proteins used in phylogenetic analyses.
Order	Accession No.	Description	Organism	Sequence Length
Coleoptera	XP_019871286.1	PREDICTED: PBAN-type neuropeptides-like	Aethina tumida	149
	XP_019770936.1	PREDICTED: PBAN-type neuropeptides-like	Dendroctonus ponderosae	156
	XP_017786058.1	PREDICTED: PBAN-type neuropeptides-like	Nicrophorus vespilloides	219
	XP_030756370.1	PBAN-type neuropeptides-like	Sitophilus oryzae	148
	XP_008200603.2	PREDICTED: PBAN-type neuropeptides isoform X1	Tribolium castaneum	165
Diptera	XP_001662212.2	PBAN-type neuropeptides	Aedes aegypti	171
	XP_307885.2	AGAP002292-PA	Anopheles gambiae str.	187
	XP_001847418.1	conserved hypothetical protein	Culex quinquefasciatus	174
	AAF54833.1	hugin	Drosophila melanogaster	191
	XP_023292789.1	protein hugin	Lucilia cuprina	198
	XP_005190209.1	PREDICTED: protein hugin	Musca domestica	225
	XP_013113275.1	PREDICTED: protein hugin	Stomoxys calcitrans	221
Hemiptera	GGBQ01031033.1	Adelphocoris lineolatus	Adelphocoris lineolatus	130
	XP_018895833.1	PREDICTED: PBAN-type neuropeptides-like	Bemisia tabaci	196
	AYP97818.1	PK (PK) mRNA, complete cds	Halyomorpha halys	106
	GECU01033249.1	Homalodisca liturata TR14784_c0_g1_i2 transcribed RNA sequence	Homalodisca liturata	126
	RZF43903.1	hypothetical protein LSTR_LSTR007239	Laodelphax striatellus	162
	GCYA01049764.1	Limnoporus canaliculatus breed wildtype C641446_8_0, transcribed RNA sequence	Limnoporus canaliculatus	141
	APB88061	pyrokinin/PBAN-like neuropeptide precursor	Lygus hesperus	131
	BAO00974.1	pyrokinin	Nilaparvata lugens	155
	GFFC01045100.1	C410340__6.0 transcribed RNA sequence	Penestragania robusta	162
	BAV78825.1	pyrokinin	Plautia stali	106
	ADA83379.1	PBAN-type neuropeptide precursor, mRNA, complete cds	Rhodnius prolixus	112
Hymenoptera	EGI64203.1	PBAN-type neuropeptide	Acromyrmex echinatior	208
	NP_001104182.1	PBAN-type neuropeptides precursor	Apis mellifera	195
	XP_012255697.1	PBAN-type neuropeptides-like	Athalia rosae	183
	XP_011257226.1	PBAN-type neuropeptides	Camponotus floridanus	177
	XP_015600657.1	PBAN-type neuropeptides	Cephus cinctus	178
	EFN90009.1	PBAN-type neuropeptides	Harpegnathos saltator	149
	NP_001161197.1	pyrokinin-like peptide precursor	Nasonia vitripennis	192
Lepidoptera	CAA08774.1	pheromone biosynthesis activating neuropeptide and FXPRL peptide precursor	Agrotis ipsilon	193
	NP_001037321.1	PBAN-type neuropeptides precursor	Bombyx mori	192
	AAL05596.1	diapause hormone-pheromone biosynthesis-activating neuropeptide	Helicoverpa armigera	194
	AAA20661.1	preproHez-PBAN	Helicoverpa zea	194
	AAO20095.1	pheromone biosynthesis-activating neuropeptide	Heliothis virescens	195
	AAX99220.1	pheromone biosynthesis activating neuropeptide	Plutella xylostella	193
	AAK84160.1	pheromone biosynthesis activating neuropeptide PBAN preprohormone	Spodoptera littoralis	191
-	FAA01225.1	TPA: neuromedin U precursor-related peptide/neuromedin U preproprotein	Homo sapiens	174
-	FAA01227.1	TPA: neuromedin U precursor-related peptide/neuromedin U preproprotein	Mus musculus	174
